# Supplementary material for: Document analysis of exertional heat illness policies and guidelines published by sports organisations in Victoria, Australia
Source: PubMed Central journal article supplement — BMJ Open Sport Exerc Med. 2020 Apr 1;6(1):e000591. doi: 10.1136/bmjsem-2019-000591 (PMC7173990; doi:10.1136/bmjsem-2019-000591), 2020-04-01
Supplement: bmjsem-2019-000591supp001.pdf [file bmjsem-2019-000591supp001.pdf]

**Supplement file 2:** Information related to internet links of the documents published on the websites of sports organisations in Victoria

| Sport                | Document title                                                                                            | URL                                                                                                                                                                                                                                                                                                                                                                                                                                                                                                                                                                                                                                                                                       |
|----------------------|-----------------------------------------------------------------------------------------------------------|-------------------------------------------------------------------------------------------------------------------------------------------------------------------------------------------------------------------------------------------------------------------------------------------------------------------------------------------------------------------------------------------------------------------------------------------------------------------------------------------------------------------------------------------------------------------------------------------------------------------------------------------------------------------------------------------|
| Athletics            | -                                                                                                         | -                                                                                                                                                                                                                                                                                                                                                                                                                                                                                                                                                                                                                                                                                         |
| Australian football  | 1. Junior football match guide<br>2. Country heat and cold policy<br>3. National extreme weather policy   | <a href="http://websites.sportstg.com/get_file.cgi?id=2924996">http://websites.sportstg.com/get_file.cgi?id=2924996</a><br><a href="http://www.afvic.com.au/wp-content/uploads/2013/10/AFL-Victoria-Country-Heat-and-Cold-Policy.pdf">http://www.afvic.com.au/wp-content/uploads/2013/10/AFL-Victoria-Country-Heat-and-Cold-Policy.pdf</a><br><a href="https://s.afl.com.au/staticfile/AFL%20Tenant/AFL/Files/Schedule%207%20-%20National%20Extreme%20Weather%20Policy.pdf">https://s.afl.com.au/staticfile/AFL%20Tenant/AFL/Files/Schedule%207%20-%20National%20Extreme%20Weather%20Policy.pdf</a>                                                                                       |
| Baseball             | 4. Heat policy                                                                                            | <a href="http://icua.nsw.cricket.com.au/files/26995/files/BV%20Heat%20Policy%202007.pdf">http://icua.nsw.cricket.com.au/files/26995/files/BV%20Heat%20Policy%202007.pdf</a>                                                                                                                                                                                                                                                                                                                                                                                                                                                                                                               |
| Basketball           | 5. Climate policy<br>6. Country heat policy<br>7. By-laws / participant protection                        | <a href="http://basketballvictoria.com.au/wp-content/uploads/2016/11/BV-Climate-Policy.pdf">http://basketballvictoria.com.au/wp-content/uploads/2016/11/BV-Climate-Policy.pdf</a><br><a href="http://bvcc.net.au/wp-content/uploads/sites/5/2016/04/BV-Heat-Policy.pdf">http://bvcc.net.au/wp-content/uploads/sites/5/2016/04/BV-Heat-Policy.pdf</a><br><a href="http://basketballvictoria.com.au/wp-content/uploads/2016/02/safety-with-amendments-to-22Nov2009.pdf">http://basketballvictoria.com.au/wp-content/uploads/2016/02/safety-with-amendments-to-22Nov2009.pdf</a>                                                                                                             |
| Bowls                | 8. Rules for competition 2016/2017<br>9. 2015-2016 Metropolitan Saturday Pennant Conditions of Play       | <a href="http://www.doncasterbowlingclub.org.au/wp-content/uploads/sites/356/2019/03/Bowls-Victoria_Rules_for_Competition_2016-2017.pdf">http://www.doncasterbowlingclub.org.au/wp-content/uploads/sites/356/2019/03/Bowls-Victoria_Rules_for_Competition_2016-2017.pdf</a><br><a href="http://www.bowlsvic.org.au/Portals/7/Pennant/2015-16/2015-2016%20BV%20Saturday%20Metro%20Pennant%20Conditions%20of%20Play%20v1.pdf">http://www.bowlsvic.org.au/Portals/7/Pennant/2015-16/2015-2016%20BV%20Saturday%20Metro%20Pennant%20Conditions%20of%20Play%20v1.pdf</a>                                                                                                                        |
| Cricket              | 10. Club Assist Well Played<br>11. Cricket Australia Junior Cricket Policy<br>12. Extreme Heat Guidelines | <a href="https://www.childabuseroyalcommission.gov.au/sites/default/files/CRIA.0003.001.0426.pdf">https://www.childabuseroyalcommission.gov.au/sites/default/files/CRIA.0003.001.0426.pdf</a><br><a href="https://www.clearinghouseforsport.gov.au/_data/assets/pdf_file/0005/238379/Cricket_Australia_Junior_Policy.pdf">https://www.clearinghouseforsport.gov.au/_data/assets/pdf_file/0005/238379/Cricket_Australia_Junior_Policy.pdf</a><br><a href="https://www.cricketvictoria.com.au/files/pages/laws-and-policies/Cricket_Victoria_Extreme_Heat_Guidelines.pdf">https://www.cricketvictoria.com.au/files/pages/laws-and-policies/Cricket_Victoria_Extreme_Heat_Guidelines.pdf</a> |
| Cycling              | 13. Extreme weather policy and guidelines (updated 2019)                                                  | <a href="https://data.cycling.org.au/sites/default/files/Extreme%20Weather%20Policy%202019.pdf">https://data.cycling.org.au/sites/default/files/Extreme%20Weather%20Policy%202019.pdf</a>                                                                                                                                                                                                                                                                                                                                                                                                                                                                                                 |
| Football             | 14. Extreme Weather Policy<br>15. Indoor Hot Weather Policy                                               | <a href="http://www.footballfedvic.com.au/wp-content/uploads/2014/06/POLICY_-_Extreme_Weather.pdf">http://www.footballfedvic.com.au/wp-content/uploads/2014/06/POLICY_-_Extreme_Weather.pdf</a><br><a href="http://www.footballfedvic.com.au/wp-content/uploads/2014/06/Indoor_Hot_Weather_Policy.pdf">http://www.footballfedvic.com.au/wp-content/uploads/2014/06/Indoor_Hot_Weather_Policy.pdf</a>                                                                                                                                                                                                                                                                                      |
| Golf                 | 16. Hot weather guidelines                                                                                | <a href="https://assets.ctfassets.net/3urhge2ecl20/6OlZdsI6EgUKcryb9EkeCB/8012824f80e585ab9650d131d0fb692b/00016506-source.pdf">https://assets.ctfassets.net/3urhge2ecl20/6OlZdsI6EgUKcryb9EkeCB/8012824f80e585ab9650d131d0fb692b/00016506-source.pdf</a>                                                                                                                                                                                                                                                                                                                                                                                                                                 |
| Hockey               | 17. Heat advice                                                                                           | <a href="https://hockeyvictoria.org.au/wp-content/uploads/2019/10/Heat-Advice.pdf">https://hockeyvictoria.org.au/wp-content/uploads/2019/10/Heat-Advice.pdf</a>                                                                                                                                                                                                                                                                                                                                                                                                                                                                                                                           |
| Indoor Sports        | 18. Extreme Heat Guidelines                                                                               | <a href="http://www.indoorsportsvictoria.com.au/docs/rules/isv-heat-policy.pdf">http://www.indoorsportsvictoria.com.au/docs/rules/isv-heat-policy.pdf</a>                                                                                                                                                                                                                                                                                                                                                                                                                                                                                                                                 |
| Life Saving          | 19. Hot Weather Guidelines                                                                                | <a href="https://lsv.com.au/wp-content/themes/abomb/pdf/members/Resources/Member_Welfare/Health_&amp;_Safety/Sun_Safety/Hot_Weather_Guidelines_2011-20121.pdf">https://lsv.com.au/wp-content/themes/abomb/pdf/members/Resources/Member_Welfare/Health_&amp;_Safety/Sun_Safety/Hot_Weather_Guidelines_2011-20121.pdf</a>                                                                                                                                                                                                                                                                                                                                                                   |
| Little Athletics     | 20. Extreme Weather Policy                                                                                | <a href="http://www.lavic.com.au/Portals/43/LAVic%20Policy%20B%20-%20Extreme%20Weather%20Policy%202015.pdf">http://www.lavic.com.au/Portals/43/LAVic%20Policy%20B%20-%20Extreme%20Weather%20Policy%202015.pdf</a>                                                                                                                                                                                                                                                                                                                                                                                                                                                                         |
| Netball <sup>a</sup> | -                                                                                                         | -                                                                                                                                                                                                                                                                                                                                                                                                                                                                                                                                                                                                                                                                                         |
| Rugby League         | 21. Heat guidelines (attachment to competition rules and regulations)                                     | <a href="http://websites.sportstg.com/get_file.cgi?id=36117911">http://websites.sportstg.com/get_file.cgi?id=36117911</a>                                                                                                                                                                                                                                                                                                                                                                                                                                                                                                                                                                 |
| Rugby Union          | -                                                                                                         | -                                                                                                                                                                                                                                                                                                                                                                                                                                                                                                                                                                                                                                                                                         |
| Softball             | 22. Inclement Weather Policy<br>23. Hot Weather Guidelines                                                | <a href="http://melbournesoftball.org.au/wp-content/uploads/2013/12/Inclement-weather-Policy.pdf">http://melbournesoftball.org.au/wp-content/uploads/2013/12/Inclement-weather-Policy.pdf</a><br><a href="http://www.softball.org.au/wp-content/uploads/2018/02/Hot-Weather-Guidelines-FINAL.pdf">http://www.softball.org.au/wp-content/uploads/2018/02/Hot-Weather-Guidelines-FINAL.pdf</a>                                                                                                                                                                                                                                                                                              |
| Surfing <sup>a</sup> | -                                                                                                         | -                                                                                                                                                                                                                                                                                                                                                                                                                                                                                                                                                                                                                                                                                         |

|                        |                                           |                                                                                                                                                                                                                                         |
|------------------------|-------------------------------------------|-----------------------------------------------------------------------------------------------------------------------------------------------------------------------------------------------------------------------------------------|
| Swimming <sup>a</sup>  | -                                         | -                                                                                                                                                                                                                                       |
| Tennis                 | 24. Extreme Weather Policy (updated 2019) | <a href="https://www.tennis.com.au/wp-content/uploads/2019/11/Extreme-Weather-Policy-Effective-25-November-2019-1.pdf">https://www.tennis.com.au/wp-content/uploads/2019/11/Extreme-Weather-Policy-Effective-25-November-2019-1.pdf</a> |
| Triathlon <sup>a</sup> | -                                         | -                                                                                                                                                                                                                                       |
| Volleyball             | 25. Extreme Heat Policy                   | <a href="https://volleyballvictoria.org.au">https://volleyballvictoria.org.au</a> › Extreme-Heat-Policy-29.1.14.docx                                                                                                                    |

<sup>a</sup> No documents found. Secondary search undertaken to confirm no documents could be located  
Cells marked as ' - ' where documents were not found.
