# Supplementary material for: Document analysis of exertional heat illness policies and guidelines published by sports organisations in Victoria, Australia
Source: PubMed Central journal article supplement — BMJ Open Sport Exerc Med. 2020 Apr 1;6(1):e000591. doi: 10.1136/bmjsem-2019-000591 (PMC7173990; doi:10.1136/bmjsem-2019-000591), 2020-04-01
Supplement: bmjsem-2019-000591supp002.pdf [file bmjsem-2019-000591supp002.pdf]

**Supplement file 1:** Supplementary data table: Best practice recommendations derived and summarised from the three consensus and position statements under five main-topic and sub-topic areas. This was used to analyse the content of the selected sports-specific EHI documents.

| Main-topic area                                      | Sub-topic area                | Description of content summarised from documents                                                                                                                                                                                                                                                                                                                                                                                                                                                                       |
|------------------------------------------------------|-------------------------------|------------------------------------------------------------------------------------------------------------------------------------------------------------------------------------------------------------------------------------------------------------------------------------------------------------------------------------------------------------------------------------------------------------------------------------------------------------------------------------------------------------------------|
| <b>1. Background knowledge<sup>a,b</sup></b>         | Definition and categorisation | Does the document provide information on what EHI is?<br>Does the document present a full overview of included conditions (i.e. muscle cramps, heat syncope, heat exhaustion, heat injury, heat stroke)?                                                                                                                                                                                                                                                                                                               |
|                                                      | Symptoms and signs            | Does the document describe the symptoms and signs for early recognition of different types of EHI that should be looked for in participants?<br>These include:<br>- Headache<br>- Light-headedness and dizziness<br>- Nausea and vomiting<br>- Fatigue<br>- Change in personality (disorientation, confusion, irrational behaviour, irritability),<br>- Change in performance (unsteadiness, loss of balance and coordination, loss of skills)<br>- Seizures                                                           |
| <b>2. Risk factors<sup>a,b</sup></b>                 | Weather-related risks         | Does the document describe relevant weather-related environmental risk factors for the sports setting? These should include:<br>- Ambient temperature<br>- Relative humidity<br>- Wind Speed<br>- Solar radiation<br>- WBGT measurements<br>- Other – Heat Stress Index                                                                                                                                                                                                                                                |
|                                                      | Intrinsic risks <sup>d</sup>  | Does the document describe risk factors relevant to the participant (intrinsic risk factors) for the sports setting that need to be considered when implementing a heat policy/plan?<br>- Age<br>- Gender<br>- Motivation/behaviours<br>- Poor physical condition<br>- Inadequate acclimatization<br>- Sleep loss<br>- High BMI<br>- Illness or medical conditions<br>- History of EHI<br>- Medications and drugs<br>- Dehydration and electrolyte imbalances<br>- High intensity of exercise                          |
|                                                      | Extrinsic risks <sup>e</sup>  | Does the document describe relevant extrinsic risk factors (non-weather) for the sports setting that need to be considered when implementing a heat policy/plan?<br>- Excessive clothing and athletic gear<br>- Peer or organisational pressure<br>- Increase workload with inadequate rest<br>- Lack of awareness and education of EHI<br>- Delay in recognising early warning signs<br>- Playing surface<br>- Venue and location (e.g. air flow, air conditioning)<br>- Level of play<br>- Time and duration of play |
| <b>3. Preventive recommendations<sup>a,b,c</sup></b> | Heat acclimatisation          | Does the document consider whether participants are acclimatised to conditions (performing increased intensity exercise in the heat for a period of 10-14 days)?<br><i>An example could be a one-off event in a location with different weather that the participant is unfamiliar with (e.g. a sports event held in Mildura with participants from Melbourne.)</i>                                                                                                                                                    |

|                                              |                               |                                                                                                                                                                                                                                                                                                                                                                                                                                                                                                                                                                      |
|----------------------------------------------|-------------------------------|----------------------------------------------------------------------------------------------------------------------------------------------------------------------------------------------------------------------------------------------------------------------------------------------------------------------------------------------------------------------------------------------------------------------------------------------------------------------------------------------------------------------------------------------------------------------|
|                                              | Hydration                     | Does the document consider pre-, during and post-event hydration strategies?<br>Does the document consider hydration in terms of volume, type and timing of fluid intake?<br>Does the document consider electrolyte replacement?<br>Does the document consider hydration monitoring?                                                                                                                                                                                                                                                                                 |
|                                              | Cooling strategies            | Does the document present a range of strategies for externally cooling a participant (e.g. cold-water immersion, cooling garments, towels, fanning)?<br>Does the document present a range of strategies for internal cooling of a participant (e.g. cold fluid, ice-slurry)?                                                                                                                                                                                                                                                                                         |
|                                              | Other                         | A range of preventive strategies might be appropriate, depending on the sport and setting. Examples that might be addressed include:<br>- Pre-participation screening<br>- Modify the work-to-rest ratio<br>- Provide additional shade and shelter<br>- Monitor players closely and recognise signs/symptoms<br>- Sun protection, encourage/allow players to wear hats, sunglasses, sunscreen<br>- Appropriate clothing/uniform modifications where required<br>- Alternate times and venues of the competition<br>- Provide education for participants              |
| <b>4. Event organisation<sup>a,b,c</sup></b> | Event modification strategies | Does the document present strategies for modification?<br>Examples include:<br>- Rescheduling<br>- Rule changes<br>- Additional breaks<br>- Shorter duration of play<br><br>Does the document present parameters (weather indices, scores) for this modification decision to be made that are clear and objective for event organisers?<br><br><i>Note, this evaluation does not include a determination on whether the parameters used are correct or evidence based – just that these parameters are well presented for an event organiser to make a decision.</i> |
|                                              | Event cancellation strategies | Does the document present parameters (weather indices, scores) for cancellation that are clear and objective for event organisers?<br><br><i>Note, this evaluation does not include a determination on whether the parameters used are correct or evidence based – just that these parameters are well presented for an event organiser to make a decision.</i>                                                                                                                                                                                                      |
| <b>5. Emergency measures<sup>a,b</sup></b>   | First aid and treatment       | Does the document describe the types of first aid measures and emergency action plans that should be in place for management of EHI?<br>These include:<br>- Lie in a cool shaded place<br>- Rest and hydrate<br>- Measuring rectal temperature<br>- Body cooling strategies (e.g. cold-water immersion)<br>- Service of qualified first aid personnel (e.g. athletic trainers)<br>- Access to nearest medical facility (contact details, transport facilities)<br>- Early body cooling before transport                                                              |

<sup>a</sup> Based on information in Armstrong et al. 2007

<sup>b</sup> Based on information in Casa et al. 2015

<sup>c</sup> Based in information in Racinais et al. 2015.

<sup>d</sup> Risk factors within the body that related to the individual

<sup>e</sup> Risk factors outside the body that not related to the individual

EHI = Exertional heat illness; WBGT = Wet-bulb globe temperature; BMI = Body mass index
